# Supplementary material for: Effect of pH and Type of Stirring on the Spontaneous Precipitation of CaCO3 at Identical Initial Supersaturation, Ionic Strength and a(Ca2+)/a(CO32−) Ratio
Source: MDPI journal article supplement (doi:10.3390/cryst11091075), 2021-09-05
Supplement: s1 [file s1]

## Supporting information for:

### Effect of pH and type of stirring on the spontaneous precipitation of $\text{CaCO}_3$ at identical initial supersaturation, ionic strength and $a(\text{Ca}^{2+}) / a(\text{CO}_3^{2-})$ ratio

Jasminka Kontrec <sup>1</sup>, Nenad Tomašić <sup>2</sup>, Nives Matijaković Mlinarić <sup>1</sup>, Damir Kralj <sup>1</sup> and Branka Njegić Džakula <sup>1,\*</sup>

<sup>1</sup>Laboratory for Precipitation Processes, Division of Materials Chemistry, Ruđer Bošković Institute, Bijenička cesta 54, 10000 Zagreb, Croatia; jasminka.kontrec@irb.hr (J.K.); nives.matijakovic@irb.hr (N.M.M.); kralj@irb.hr (D.K.); bnjeg@irb.hr (B.N.D.)

<sup>2</sup>Faculty of Science, University of Zagreb, Horvatovac 102A, 10000 Zagreb, Croatia; ntomasic@geol.pmf.hr

\*Correspondence: bnjeg@irb.hr, Tel. +385-1-457-1343

\*To whom correspondence should be addressed:

Branka Njegić Džakula  
Division of Materials Chemistry  
Ruđer Bošković Institute  
Bijenička cesta 54, 10 000 Zagreb, Croatia  
E-mail: bnjeg@irb.hr  
Tel: + 385 1 4571 343

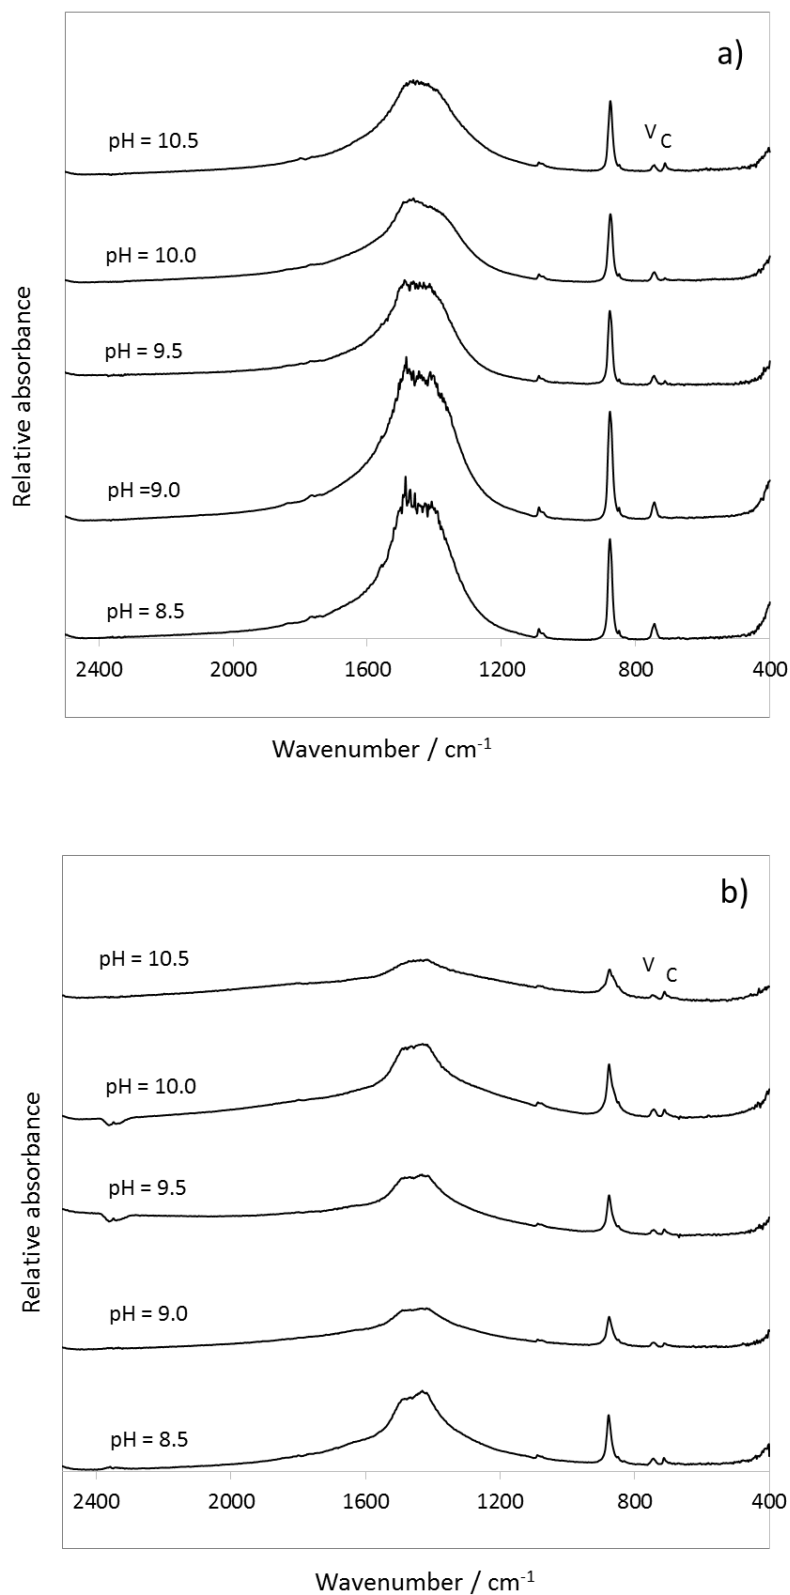

**Fig. SI 1.** FTIR spectra of calcium carbonate precipitated at different initial pH in the precipitation systems which were stirred: (a) magnetically and (b) mechanically during the spontaneous precipitation of  $\text{CaCO}_3$  at identical initial saturation ratio ( $S_C = 14.4 \pm 0.1$  and  $S_V = 7.5 \pm 0.1$ ), ionic strength ( $I_c = 0.1 \text{ mol dm}^{-3}$ ) and activity ratio of constituent ions ( $a(\text{Ca}^{2+}) / a(\text{CO}_3^{2-}) = 1.00$ ). V-vaterite, C-calcite

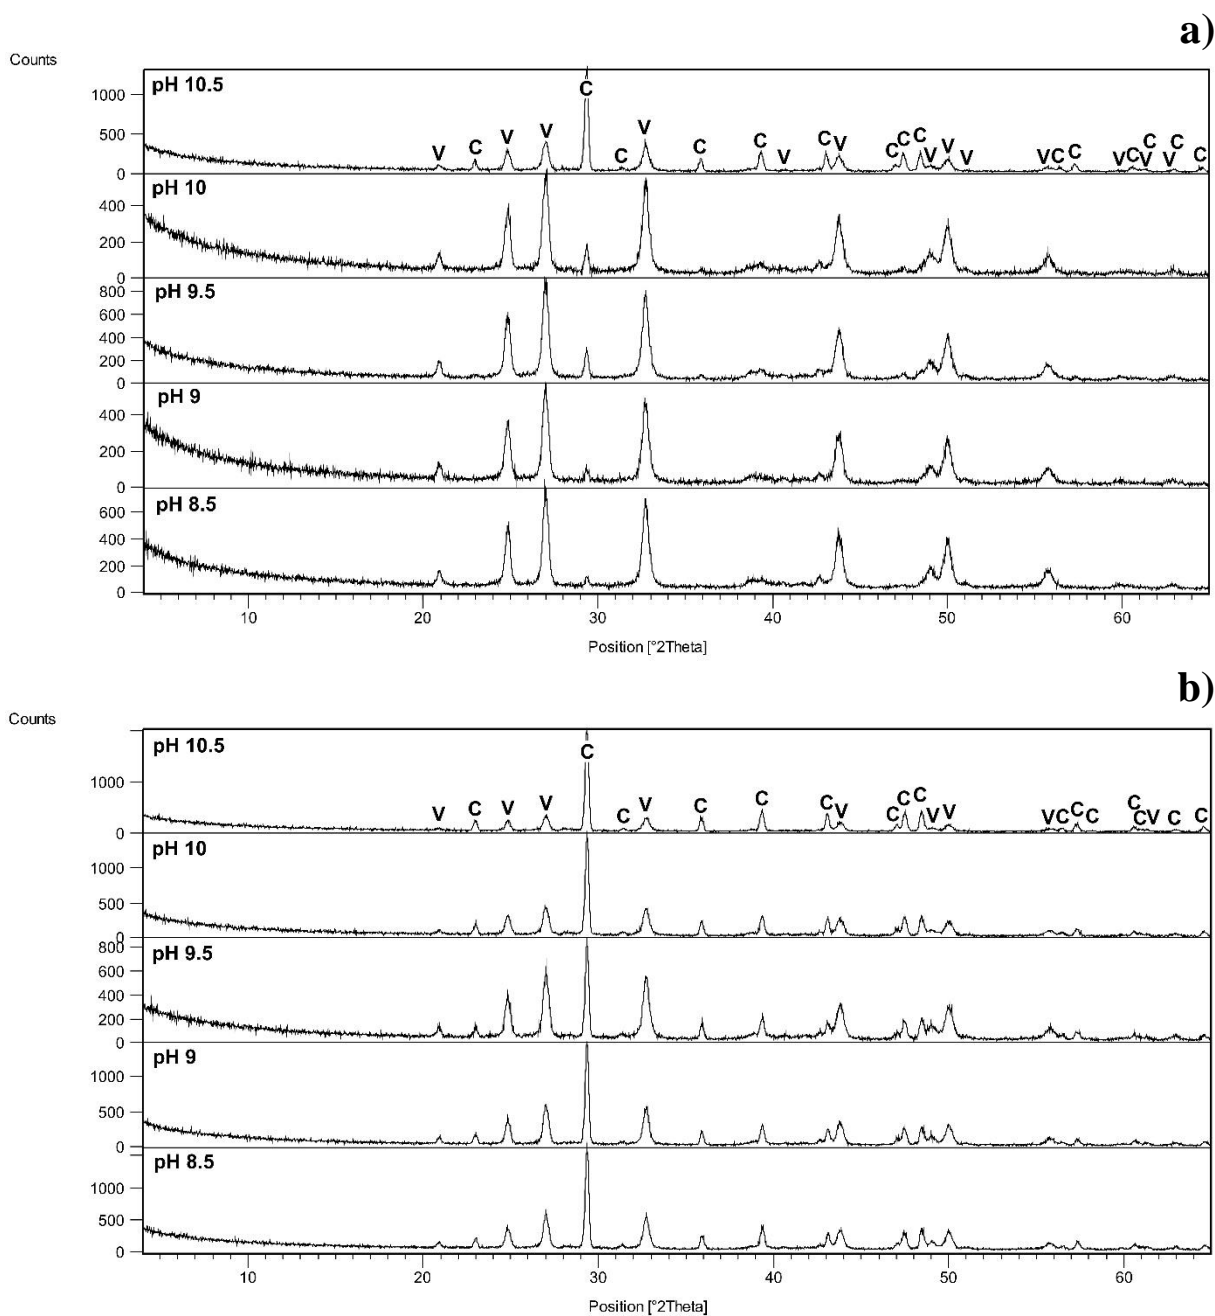

**Fig. SI 2.** PXRD patterns of calcium carbonate precipitated at different initial pH in the precipitation systems which were stirred: (a) magnetically and (b) mechanically during the spontaneous precipitation of  $\text{CaCO}_3$  at identical initial saturation ratio ( $S_C = 14.4 \pm 0.1$  and  $S_V = 7.5 \pm 0.1$ ), ionic strength ( $I_c = 0.1 \text{ mol dm}^{-3}$ ) and activity ratio of constituent ions ( $a(\text{Ca}^{2+}) / a(\text{CO}_3^{2-}) = 1.00$ ). V-vaterite, C-calcite
